# Supplementary material for: Insulin signaling promotes germline proliferation inC. elegans
Source: Oxford University Press journal article supplement (doi:10.1242/dev.042523), 2010-01-28
Supplement: dev042523tables1.pdf [file dev042523tables1.pdf]

Table S1. Strains

| A Strains used for experiments presented in main text |                                                                                                                      |                                                                                                                                                                                                                                                                                                      |
|-------------------------------------------------------|----------------------------------------------------------------------------------------------------------------------|------------------------------------------------------------------------------------------------------------------------------------------------------------------------------------------------------------------------------------------------------------------------------------------------------|
| Strain                                                | Genotype                                                                                                             | Reference/Source                                                                                                                                                                                                                                                                                     |
| CB1370                                                | <i>daf-2(e1370)</i>                                                                                                  | (Riddle et al., 1981)                                                                                                                                                                                                                                                                                |
| DR1567                                                | <i>daf-2(m577)</i>                                                                                                   | (Gems et al., 1998)                                                                                                                                                                                                                                                                                  |
| DR1572                                                | <i>daf-2(e1368)</i>                                                                                                  | (Gems et al., 1998)                                                                                                                                                                                                                                                                                  |
| CF1553                                                | <i>muls84 [pAD76 (sod-3::GFP)]</i>                                                                                   | (Libina et al., 2003)                                                                                                                                                                                                                                                                                |
| CF1038                                                | <i>daf-16(mu86)</i>                                                                                                  | (Lin et al., 1997)                                                                                                                                                                                                                                                                                   |
| CB4037                                                | <i>glp-1 (e2141)</i>                                                                                                 | (Priess et al., 1987)                                                                                                                                                                                                                                                                                |
| PD8488                                                | <i>rrf-1(pk1417)</i>                                                                                                 | (Sijen et al., 2001)                                                                                                                                                                                                                                                                                 |
| GC678                                                 | <i>tnIs6[[lim-7::GFP; rol-6 (su1006)]; qIs19[lag-2::GFP; rol-6(su1006)]</i>                                          | (Killian and Hubbard, 2004)                                                                                                                                                                                                                                                                          |
| GC888                                                 | <i>glp-1(bn18)</i>                                                                                                   | (Kodoyianni et al., 1992)                                                                                                                                                                                                                                                                            |
| GC833                                                 | <i>glp-1(ar202)</i>                                                                                                  | (Pepper et al., 2003a)                                                                                                                                                                                                                                                                               |
| RB712                                                 | <i>daf-18(ok480)</i>                                                                                                 | C. elegans Gene Knockout Consortium, Oklahoma City and Vancouver, Canada, and the <i>Caenorhabditis</i> Genetics Center (CGC), Minneapolis, MN, USA                                                                                                                                                  |
| CF1295                                                | <i>daf-16(mu86) I; daf-2(e1370) III; muEx108[pKL99-2(DAF-16::GFP/daf16bKO) + pRF4(rol-6(su1006))]</i>                | (Lin et al., 2001)                                                                                                                                                                                                                                                                                   |
| GC1019                                                | <i>rrf-1(pk1417); daf-2(e1370)</i>                                                                                   | This work                                                                                                                                                                                                                                                                                            |
| GC854                                                 | <i>daf-2(e1370); glp-1(e2141)</i>                                                                                    | This work                                                                                                                                                                                                                                                                                            |
| GC1071                                                | <i>ins-3(ok2488)<sup>a</sup></i>                                                                                     | This work: 2x backcross of RB1915; C. elegans Gene Knockout Consortium and the CGC <sup>a</sup>                                                                                                                                                                                                      |
| GC1039                                                | <i>ins-3(tm2988)</i>                                                                                                 | This work: 8x backcross of FX02988; National Bioresource Project for the Nematode C. elegans, Tokyo, Japan                                                                                                                                                                                           |
| GC865                                                 | <i>daf-16(mu86); muEx108[pKL99-2(daf-16::GFP/daf16bKO) + pRF4(rol-6(su1006))]</i>                                    | This work: constructed from CF1038 <i>daf-16(mu86)</i> (Lin et al., 1997) and CF1295 <i>daf-16(mu86) I; daf-2(e1370) III; muEx108[pKL99-2(DAF-6::GFP/daf16bKO) + pRF4(rol-6(su1006))]</i> (Lin et al., 2001), this fusion uses isoform a of <i>daf-16</i> and contains a stop codon before isoform b |
| GC1079                                                | <i>ins-3(ok2488); naEx187[pGC467, pRF4]<sup>b</sup></i>                                                              | This work                                                                                                                                                                                                                                                                                            |
| GC1078                                                | <i>ins-3(tm2988); naEx186[pGC464; pRF4]<sup>b</sup></i>                                                              | This work                                                                                                                                                                                                                                                                                            |
| GC1087                                                | <i>ins-3(tm2988); naEx195[pGC464; pRF4]<sup>b</sup></i>                                                              | This work                                                                                                                                                                                                                                                                                            |
| GC1089                                                | <i>ins-3(tm2988); naEx197[pGC464; pRF4]<sup>b</sup></i>                                                              | This work                                                                                                                                                                                                                                                                                            |
| DR1309                                                | <i>daf-16(m26); daf-2(e1370)</i>                                                                                     | P. Albert and D. Riddle, via CGC                                                                                                                                                                                                                                                                     |
| CF1442                                                | <i>daf-16(mu86); daf-2(e1370); muEx169[Punc-119::GFP::DAF-16 + pRF4 rol-6 (su1006)]</i>                              | (Libina et al., 2003)                                                                                                                                                                                                                                                                                |
| CF1514                                                | <i>daf-16(mu86); daf-2(e1370); muEx211[pNL213 (Pges-1::GFP::DAF-16) + pRF4 rol-6 (su1006)]</i>                       | (Libina et al., 2003)                                                                                                                                                                                                                                                                                |
| CF1515                                                | <i>daf-16(mu86); daf-2(e1370); muEx212[pNL212 (Pmyo-3::GFP::DAF-16) + pRF4 rol-6 (su1006)]</i>                       | (Libina et al., 2003)                                                                                                                                                                                                                                                                                |
| GC1143                                                | <i>unc-119(ed3)III; nals43[pGC492(Prpl-11.1::daf-16cDNA::GFP::nos-2 3'UTR - unc-119(+))]<sup>c</sup></i>             | This work: microparticle bombardment (Praitis et al., 2001) of DP38 worms with pGC492                                                                                                                                                                                                                |
| GC1144                                                | <i>daf-16(mu86)I; daf-2(e1370)III; nals43[pGC492(Prpl-11.1::daf-16cDNA::GFP::nos2 3'UTR unc-119(+))]<sup>c</sup></i> | This work: generated by crossing GC1143 with DR1309                                                                                                                                                                                                                                                  |
| GC1109                                                | <i>daf-16(m26) I; daf-2(e1370) II; naEx202 [pGC461 (Plag-2::daf-16::GFP) + pRF4]</i>                                 | This work: <i>pGC461</i> was injected to DR1309                                                                                                                                                                                                                                                      |
| RB777                                                 | <i>hcf-1(ok559)</i>                                                                                                  | C. elegans Gene Knockout Consortium, and the CGC                                                                                                                                                                                                                                                     |
| GC1109                                                | <i>naEx202[pGC461; pRF4]<sup>d</sup></i>                                                                             | This work                                                                                                                                                                                                                                                                                            |
| GC1004                                                | <i>ins-3(tm2988) cross</i>                                                                                           | This work: taken from spontaneous male from GC1039                                                                                                                                                                                                                                                   |
| GC585                                                 | <i>pro-1(na48)I/mIn1[dpy-10(e128) mIs14]</i>                                                                         | Used as a carrier of the <i>mIs14</i> balancer                                                                                                                                                                                                                                                       |
| GC1142                                                | <i>ins-3(tm2988); ins-3(ok2488)</i>                                                                                  | This work: generated by crossing GC1004 males to GC1071; using GC585 to balance <i>ins-3</i>                                                                                                                                                                                                         |

**B Strains used for data presented in supplementary material**

| Strain | Genotype                                                                                                                        | Reference/Source                                                                                                                                                                                                                             |
|--------|---------------------------------------------------------------------------------------------------------------------------------|----------------------------------------------------------------------------------------------------------------------------------------------------------------------------------------------------------------------------------------------|
| CB1375 | <i>daf-18(e1375)</i>                                                                                                            | (Riddle et al., 1981)                                                                                                                                                                                                                        |
| FT224  | <i>xnls87</i> [pMP322 ( <i>Psyn-4::GFP-syn-4::syn-4 3' UTR</i> ); <i>unc-119 (+)</i> ]; <i>syn-4 tag-316(ok372) IV</i>          | Gift from Ann Wehman and Jeremy Nance; pMP322 gift from Michael Glotzer; <i>ok372</i> removes both <i>syn-4</i> and <i>tag-316</i>                                                                                                           |
| GC967  | <i>daf-16(mu86)</i> ; <i>glp-1(ar202)</i> ; <i>naEx148</i> [pGP30(DAF-16::GFP) + <i>sur-5::GFP</i> ]                            | This work: injection of GC908 <i>daf-16(mu86)</i> ; <i>glp-1(ar202)</i> with pGP30 (Henderson and Johnson, 2001) at 1ng/μl; <i>sur-5::GFP</i> at 20ng/μl; and pBluescript DNA at 80ng/μl; DAF-16 sequences in pGP30 correspond to isoform a2 |
| GC1112 | <i>daf-16(mu86)</i> ; <i>daf-2(e1370)</i> ; <i>naEx148</i> [pGP30(DAF-16::GFP) + <i>sur-5::GFP</i> ]                            | This work: generated by crossing GC967 with DR1309 males and selecting for GFP-positive dauer worms and selecting against <i>glp-1(ar202)</i>                                                                                                |
| GC1080 | <i>smg-1(cc546)</i> ; <i>naEx188</i> [pGC487; pRF4] <sup>e</sup>                                                                | This work                                                                                                                                                                                                                                    |
| GC1081 | <i>smg-1(cc546)</i> ; <i>naEx189</i> [pGC487; pRF4] <sup>e</sup>                                                                | This work                                                                                                                                                                                                                                    |
| GC1082 | <i>smg-1(cc546)</i> ; <i>naEx190</i> [pGC486; pRF4] <sup>e</sup>                                                                | This work                                                                                                                                                                                                                                    |
| GC1083 | <i>smg-1(cc546)</i> ; <i>naEx191</i> [pGC486; pRF4] <sup>e</sup>                                                                | This work                                                                                                                                                                                                                                    |
| GC1084 | <i>smg-1(cc546)</i> ; <i>naEx192</i> [pGC486; pRF4] <sup>e</sup>                                                                | This work                                                                                                                                                                                                                                    |
| GC1085 | <i>smg-1(cc546)</i> ; <i>naEx193</i> [pGC486; pRF4] <sup>e</sup>                                                                | This work                                                                                                                                                                                                                                    |
| GC1088 | <i>naEx196</i> [pGC467; pRF4] <sup>f</sup>                                                                                      | This work                                                                                                                                                                                                                                    |
| GC1095 | <i>naEx198</i> [pGC467; pRF4] <sup>f</sup>                                                                                      | This work                                                                                                                                                                                                                                    |
| GC1076 | <i>naEx184</i> [pGC464; pRF4] <sup>f</sup>                                                                                      | This work                                                                                                                                                                                                                                    |
| GC1077 | <i>naEx185</i> [pGC464; pRF4] <sup>f</sup>                                                                                      | This work                                                                                                                                                                                                                                    |
| GC1145 | <i>daf-2(e1370)</i> ; <i>xnls879</i> pMP322( <i>Psyn-4::GFP::syn-4 3'UTR</i> ); <i>unc-119(+)</i> ; <i>syn-4 tag-316(ok372)</i> | This work: generated by crossing FT224 with CB1370                                                                                                                                                                                           |

<sup>a</sup> Three out of 12 *ins-3(ok2488)* worms examined for the brood size analysis shown in Fig. 6 laid exclusively dead embryos, presumably due to a maternal effect lethal mutation in the background. They were not included in the analysis.

<sup>b</sup> Rescuing (pGC) plasmids were injected at 10 ng/μl together with 100 ng/μl of the transformation marker pRF4 [*rol-6(su1006)*].

<sup>c</sup> The presence of the transgene was determined using PCR with primers to GFP. The data shown in Fig. 3C is from the line as scored shortly after it was established and expression validated by RT-PCR. However, subsequent RT-PCR indicated that expression from the transgene was becoming silenced (likely reflected in large variation of the data, see Fig. S2), and later thaws of our frozen stocks showed no expression indicating complete silencing subsequent to the experiments presented in this data collection. Measurements conducted on thawed strains (after silencing) also lost *daf-16(+)* activity.

<sup>d</sup> Microinjection of DR1309 was performed with 5 ng/μl of pGC461 [*P<sub>lag-2</sub>::daf-16::GFP*] and 100 ng/μl of pRF4 [*rol-6(su1006)*].

<sup>e</sup> *ins-3* and *ins-33* rescue: (GC1080-GC1085) generated by microinjection of PD8120 *smg-1(cc546)* (A. Fire and the *Caenorhabditis* Genetics Center, Minneapolis, MN, USA) with 20 ng/μl of the (pGC) expression plasmid and 100 ng/μl of pRF4 [*rol-6(su1006)*].

<sup>f</sup> *ins-3* and *ins-33* overexpression: (GC1088, GC1095 and GC1076, GC1077) microinjection of N2 was performed with 100 ng/μl of the expression plasmid and 100 ng/μl of pRF4 [*rol-6(su1006)*].
