# Supplementary material for: Insulin signaling promotes germline proliferation inC. elegans
Source: Oxford University Press journal article supplement (doi:10.1242/dev.042523), 2010-01-28
Supplement: dev042523tables2.pdf [file dev042523tables2.pdf]

**Table S2. Plasmids****A Plasmids used for data presented in main text**

| Plasmid                  | Description                                                    | Reference/Source/Construction                                                                                                                                                                                                                                                                                  |
|--------------------------|----------------------------------------------------------------|----------------------------------------------------------------------------------------------------------------------------------------------------------------------------------------------------------------------------------------------------------------------------------------------------------------|
| pGC464                   | <i>ins-33</i> rescue and overexpression                        | This work: ~8kb genomic region of <i>ins-33</i> was PCR amplified using the following primers: AAGGAGAACAACACTGTATCGAGATTTGAGGG and CATCGTCTGGAACAATGAAGAAACGAATGGGCGG and TA cloned into pCR-XL-TOPO (Invitrogen)                                                                                             |
| pGC467                   | <i>ins-3</i> rescue and overexpression                         | This work: ~11.5kb genomic region of <i>ins-3</i> was PCR amplified using the following primers: ATGAAGCGGAGAGAAGAAGTGC GGAGAGAAGG and GTTATGGACATATCGTACTAAGTCTGCTGCC and TA- cloned into pCR-XL-TOPO (Invitrogen)                                                                                            |
| sjj_C46A5.9              | <i>hcf-1</i>                                                   | (Kamath et al., 2003) <sup>a</sup>                                                                                                                                                                                                                                                                             |
| sjj_T07A9.6              | <i>daf-18</i>                                                  | (Kamath et al., 2003) <sup>a</sup>                                                                                                                                                                                                                                                                             |
| sjj_R13H8.2 <sup>b</sup> | <i>daf-16</i>                                                  | (Kamath et al., 2003) <sup>a</sup>                                                                                                                                                                                                                                                                             |
| sjj_R13H8.1 <sup>b</sup> | <i>daf-16</i>                                                  | (Kamath et al., 2003) <sup>a</sup>                                                                                                                                                                                                                                                                             |
| mv_CAA10315              | <i>daf-18</i><br>RNAi-targeting:<br><i>ins-1, ins-2, ins-3</i> | (Rual et al., 2004; C.elegans ORF-RNAi library (Geneservice Ltd.)) <sup>a</sup><br>Kindly provided by Monica Driscoll <sup>a</sup>                                                                                                                                                                             |
| pGC488                   | <i>daf-2</i>                                                   | This work: created by ligating the <i>KpnI/XbaI</i> fragment from pKDK33 (Wolkow et al., 2000) to similarly digested L4440                                                                                                                                                                                     |
| pGC461                   | Distal tip cell expression of DAF-16                           | This work: <i>daf-16::GFP</i> fusion (gift of T. Johnson) was fused to the <i>lag-2</i> promoter in pJK590 (Blelloch et al., 1999; Mathies et al., 2003).                                                                                                                                                      |
| pGC492                   | Germline expression of DAF-16                                  | This work: <i>daf-16::GFP</i> fusion (gift of T. Johnson) was fused to <i>nos-2</i> 3'UTR. The <i>rpl-11.1</i> promoter (5'-cgcggttcaatccccggttcgccctttttt.....tcacagttttcaaatttttatgtattatgc-3') and then cloned along with the <i>C. briggsae unc-119(+)</i> gene into pPD117.01 (kind gift of Barth Grant). |

**B Plasmids used for data presented in supplementary material**

| Plasmid     | Description                                                                                                                                                                                                                                                                                    | Reference/Source/Construction                                                                                                                                                                                                                                                                                                                                                                                                                                                                                                                                                                                                                                                                            |
|-------------|------------------------------------------------------------------------------------------------------------------------------------------------------------------------------------------------------------------------------------------------------------------------------------------------|----------------------------------------------------------------------------------------------------------------------------------------------------------------------------------------------------------------------------------------------------------------------------------------------------------------------------------------------------------------------------------------------------------------------------------------------------------------------------------------------------------------------------------------------------------------------------------------------------------------------------------------------------------------------------------------------------------|
| pGC487      | <i>ins-3</i> expression                                                                                                                                                                                                                                                                        | This work: A 5565 bp 5' fragment of <i>ins-3</i> was PCR amplified from pGC467 using primers: CAAGCTAGCTAAGTAAGTTGTATTGTTACAAACG and CAAGGGCCCCGTGTGAAGTCGACTTTGCAGATCAG, digested with <i>NheI</i> and <i>Apal</i> , and ligated to similarly digested pGC305 (Voutev and Hubbard, 2008), to create pGC485. Next, a 5749 bp fragment covering the first intron to the 3' downstream region, was PCR amplified from pGC467 using primers: AACCTGCAGGGTTGTCGACATGAAGCGGAGAG and CAACCCGGGTATTTCAGAACAGGAATTGATAAATGTGTC, digested with <i>SbfI</i> and <i>XmaI</i> , and ligated to similarly digested pGC485, to create pGC487                                                                           |
| pGC486      | <i>ins-33</i> expression<br><br>RNAi-targeting: <i>ins-4, ins-5 ins-6, ins-8, ins-9, ins-10, ins-11 ins-12, ins-13, ins-14, ins-15, ins-16, ins-17, ins-18, ins-19, ins-20, ins-21, ins-22, ins-23, ins-26, ins-27, ins-28, ins-29, ins-30, ins-32, ins-33, ins-34, ins-35, ins-36, ins-37</i> | This work: A 1287 bp 5' fragment of <i>ins-33</i> was PCR amplified from pGC464 using the following primers: CAAGGATCCAAGGAGAACAACACTGTATCGAG and CAAGAGCTCTTTTGTCAAAAAATCAGCAC, digested with <i>BamHI</i> and <i>SacI</i> , and ligated to similarly digested pGC305 (Voutev and Hubbard, 2008), to create pGC482. Next, a 5800 bp fragment covering the first intron to the 3' downstream region, was PCR amplified from pGC464 using the following primers: CAAGCTAGCTAAGTAAGCGATGAAAATCGATAGAACAC and CAAGGGCCCCATCGTCTGGAACAATGAAGAAACG, digested with <i>NheI</i> and <i>Apal</i> , and ligated to similarly digested pGC482, to create pGC486<br>Kindly provided by Monica Driscoll <sup>a</sup> |
| sjj_F21E9.4 | <i>ins-39</i>                                                                                                                                                                                                                                                                                  | (Kamath et al., 2003) <sup>a</sup>                                                                                                                                                                                                                                                                                                                                                                                                                                                                                                                                                                                                                                                                       |
| pGC314      | <i>ins-7</i>                                                                                                                                                                                                                                                                                   | This work <sup>c</sup> : ATATTCTAGAATGCCACCAATAATTTTGG and ATATCTCGAGTTAAGGACAGCACTGTTTTTC                                                                                                                                                                                                                                                                                                                                                                                                                                                                                                                                                                                                               |
| pGC315      | <i>ins-24</i>                                                                                                                                                                                                                                                                                  | This work <sup>c</sup> : ATATTCTAGAATGAGATCTCCACCTTG and ATATCTCGAGTTAGAAAACGAAGCCAGATG                                                                                                                                                                                                                                                                                                                                                                                                                                                                                                                                                                                                                  |
| pGC316      | <i>ins-31</i>                                                                                                                                                                                                                                                                                  | This work <sup>c</sup> : ATATTCTAGAATGAAGATGCCCTTGATC and ATATCTCGAGTCAGTAAAAGCCTGGACG                                                                                                                                                                                                                                                                                                                                                                                                                                                                                                                                                                                                                   |
| pGC317      | <i>ins-38</i>                                                                                                                                                                                                                                                                                  | This work <sup>c</sup> : ATATTCTAGAATGAATCTTTTTCTCCTCG and ATATCTCGAGCTATAGCTTGCTGGGGC                                                                                                                                                                                                                                                                                                                                                                                                                                                                                                                                                                                                                   |
| pGC318      | <i>daf-28</i>                                                                                                                                                                                                                                                                                  | This work <sup>c</sup> : ATATTCTAGAATGAACCTGCAAGCTCATCG and ATATCTCGAGGTGGTTCACAGGCGTCTC                                                                                                                                                                                                                                                                                                                                                                                                                                                                                                                                                                                                                 |

<sup>a</sup> Verified by DNA sequencing.<sup>b</sup> These two reagents gave similar results.<sup>c</sup> In each case, plasmids were made by PCR amplification from a cDNA library (Invitrogen) using indicated primers, digested with *XbaI/XhoI*, and ligated into similarly digested L4440.
