# Supplementary material for: Insulin signaling promotes germline proliferation inC. elegans
Source: Oxford University Press journal article supplement (doi:10.1242/dev.042523), 2010-01-28
Supplement: dev042523tables3.pdf [file dev042523tables3.pdf]

Table S3. Number of germ nuclei in the proliferative zone

| Strain                   | Genotype                                                                            | RNAi reagent               | RNAi target   | Number of nuclei <sup>a</sup> | SEM <sup>b</sup> | n <sup>b</sup> |
|--------------------------|-------------------------------------------------------------------------------------|----------------------------|---------------|-------------------------------|------------------|----------------|
| N2                       |                                                                                     |                            |               | 209.0                         | ±3.6             | 33             |
| N2                       |                                                                                     | L4440                      |               | 195.6                         | ±8.4             | 61             |
| N2                       |                                                                                     | <i>ins-1</i> <sup>c</sup>  | <i>ins-1</i>  | 187.6                         | ±6.5             | 19             |
| N2                       |                                                                                     | <i>ins-3</i> <sup>c</sup>  | <i>ins-3</i>  | 135.9                         | ±6.6             | 39             |
| N2                       |                                                                                     | <i>ins-33</i> <sup>c</sup> | <i>ins-33</i> | 136.9                         | ±6.0             | 45             |
| N2                       |                                                                                     | sjj_C46A5.9 <sup>d</sup>   | <i>hcf-1</i>  | 168.9                         | ±3.8             | 24             |
| N2                       |                                                                                     | pGC488 <sup>e</sup>        | <i>daf-2</i>  | 175.0                         | ±4.4             | 21             |
| N2                       | (male)                                                                              |                            |               | 159.7                         | ±6.0             | 19             |
| N2                       | (male)                                                                              | L4440                      |               | 162.1                         | ±4.4             | 19             |
| N2                       | (male)                                                                              | <i>ins-3</i> <sup>c</sup>  | <i>ins-3</i>  | 130.0                         | ±9.5             | 8              |
| N2                       | (male)                                                                              | <i>ins-33</i> <sup>c</sup> | <i>ins-33</i> | 134.6                         | ±9.1             | 9              |
| PD8488                   | <i>rrf-1(pk1417)</i>                                                                | L4440                      |               | 193.9                         | ±3.7             | 24             |
| PD8488                   | <i>rrf-1(pk1417)</i>                                                                | <i>ins-1</i> <sup>c</sup>  | <i>ins-1</i>  | 187.7                         | ±6.1             | 17             |
| PD8488                   | <i>rrf-1(pk1417)</i>                                                                | <i>ins-3</i> <sup>c</sup>  | <i>ins-3</i>  | 188.7                         | ±4.4             | 12             |
| PD8488                   | <i>rrf-1(pk1417)</i>                                                                | <i>ins-33</i> <sup>c</sup> | <i>ins-33</i> | 178.8                         | ±7.7             | 19             |
| PD8488                   | <i>rrf-1(pk1417)</i>                                                                | sjj_C46A5.9 <sup>d</sup>   | <i>hcf-1</i>  | 166.9                         | ±3.9             | 21             |
| PD8488                   | <i>rrf-1(pk1417)</i>                                                                | pGC488 <sup>e</sup>        | <i>daf-2</i>  | 161.6                         | ±7.4             | 25             |
| CB1370                   | <i>daf-2(e1370)</i>                                                                 |                            |               | 128.4                         | ±3.6             | 29             |
| CB1370                   | <i>daf-2(e1370)</i> (male)                                                          |                            |               | 110.5                         | ±6.6             | 12             |
| CB1370                   | <i>daf-2(e1370)</i>                                                                 | L4440                      |               | 140.0                         | ±3.2             | 34             |
| CB1370                   | <i>daf-2(e1370)</i>                                                                 | <i>ins-3</i> <sup>c</sup>  | <i>ins-3</i>  | 142.3                         | ±2.3             | 16             |
| CB1370                   | <i>daf-2(e1370)</i>                                                                 | <i>ins-33</i> <sup>c</sup> | <i>ins-33</i> | 138.3                         | ±4.5             | 15             |
| CB1370                   | <i>daf-2(e1370)</i>                                                                 | sjj_T07A9.6 <sup>d</sup>   | <i>daf-18</i> | 176.5                         | ±5.6             | 10             |
| CB1370                   | <i>daf-2(e1370)</i>                                                                 | mv_CAA10315 <sup>f</sup>   | <i>daf-18</i> | 184.3                         | ±5.5             | 15             |
| CB1370                   | <i>daf-2(e1370)</i>                                                                 | sjj_R13H8.2 <sup>d</sup>   | <i>daf-16</i> | 175.5                         | ±4.6             | 11             |
| CB1370                   | <i>daf-2(e1370)</i>                                                                 | sjj_R13H8.1 <sup>d</sup>   | <i>daf-16</i> | 182.2                         | ±2.8             | 44             |
| CB1370                   | <i>daf-2(e1370)</i>                                                                 | sjj_C46A5.9 <sup>d</sup>   | <i>hcf-1</i>  | 130.5                         | ±5.6             | 14             |
| GC1019                   | <i>rrf-1(pk1417);daf-2(e1370)</i>                                                   | L4440                      |               | 144.9                         | ±4.2             | 26             |
| GC1019                   | <i>rrf-1(pk1417);daf-2(e1370)</i>                                                   | sjj_T07A9.6 <sup>d</sup>   | <i>daf-18</i> | 177.9                         | ±4.4             | 11             |
| GC1019                   | <i>rrf-1(pk1417);daf-2(e1370)</i>                                                   | mv_CAA10315 <sup>f</sup>   | <i>daf-18</i> | 182.6                         | ±3.7             | 16             |
| GC1019                   | <i>rrf-1(pk1417);daf-2(e1370)</i>                                                   | sjj_R13H8.1 <sup>d</sup>   | <i>daf-16</i> | 188.8                         | ±4.0             | 36             |
| DR1309                   | <i>daf-16(mu86);daf-2(e1370)</i>                                                    |                            |               | 194.4                         | ±3.3             | 20             |
| CF1295sib <sup>g</sup>   | <i>daf-16(mu86);daf-2(e1370)</i>                                                    |                            |               | 199.1                         | ±5.1             | 14             |
| CF1295 <sup>g</sup>      | <i>daf-16(mu86);daf-2(e1370);<br/>muEx108[DAF-16::GFP]</i>                          |                            |               | 140.5                         | ±5.8             | 14             |
| GC1112sib <sup>g</sup>   | <i>daf-16(mu86);daf-2(e1370)</i>                                                    |                            |               | 199.8                         | ±2.2             | 10             |
| GC1112 <sup>g</sup>      | <i>daf-16(mu86);daf-2(e1370);<br/>naEx148[DAF-16::GFP]</i>                          |                            |               | 153.7                         | ±6.8             | 9              |
| CF1515sib <sup>g,h</sup> | <i>daf-16(mu86);daf-2(e1370)</i>                                                    |                            |               | 193.6                         | ±6.5             | 11             |
| CF1515 <sup>g,h</sup>    | <i>daf-16(mu86);daf-2(e1370);<br/>muEx212[Pmyo-3::daf-16::GFP]</i>                  |                            |               | 174.3                         | ±6.3             | 28             |
| CF1514sib <sup>g</sup>   | <i>daf-16(mu86);daf-2(e1370)</i>                                                    |                            |               | 192.3                         | ±8.1             | 10             |
| CF1514 <sup>g</sup>      | <i>daf-16(mu86);daf-2(e1370);<br/>muEx211[Pge::daf-16::GFP]</i>                     |                            |               | 188.9                         | ±5.6             | 16             |
| CF1442sib <sup>g</sup>   | <i>daf-16(mu86);daf-2(e1370)</i>                                                    |                            |               | 194.1                         | ±5.4             | 12             |
| CF1442 <sup>g</sup>      | <i>daf-16(mu86);daf-2(e1370);<br/>muEx169[Punc119::daf-16::GFP]</i>                 |                            |               | 186.0                         | ±7.1             | 16             |
| GC1109sib <sup>g</sup>   | <i>daf-16(mu86);daf-2(e1370)</i>                                                    |                            |               | 204.0                         | ±4.6             | 10             |
| GC1109 <sup>g</sup>      | <i>daf-16(mu86);daf-2(e1370);<br/>naEx202 [Plag-2::daf-16::GFP]</i>                 |                            |               | 183.3                         | ±3.5             | 12             |
| GC1144                   | <i>daf-16(mu86);daf-2(e1370);<br/>naEx202 ; nals43[Prpl-11.1::daf-<br/>16::GFP]</i> |                            |               | 161.8                         | ±5.5             | 29             |
| CB1375                   | <i>daf-18(e1375)</i>                                                                | L4440                      |               | 173.2                         | ±6.5             | 12             |
| CB1375                   | <i>daf-18(e1375)</i>                                                                | <i>ins-1</i> <sup>c</sup>  | <i>ins-1</i>  | 184.5                         | ±10.4            | 13             |
| CB1375                   | <i>daf-18(e1375)</i>                                                                | <i>ins-3</i> <sup>c</sup>  | <i>ins-3</i>  | 179.8                         | ±8.9             | 13             |
| CB1375                   | <i>daf-18(e1375)</i>                                                                | <i>ins-33</i> <sup>c</sup> | <i>ins-33</i> | 176.9                         | ±7.5             | 13             |
| RB712                    | <i>daf-18(ok480)</i>                                                                | L4440                      |               | 185.3                         | ±7.3             | 20             |
| RB712                    | <i>daf-18(ok480)</i>                                                                | <i>ins-1</i> <sup>c</sup>  | <i>ins-1</i>  | 172.1                         | ±7.1             | 14             |
| RB712                    | <i>daf-18(ok480)</i>                                                                | <i>ins-3</i> <sup>c</sup>  | <i>ins-3</i>  | 179.9                         | ±8.8             | 16             |
| RB712                    | <i>daf-18(ok480)</i>                                                                | <i>ins-33</i> <sup>c</sup> | <i>ins-33</i> | 173.4                         | ±5.2             | 17             |
| CF1038                   | <i>daf-16(mu86)</i>                                                                 | L4440                      |               | 181.3                         | ±6.2             | 23             |
| CF1038                   | <i>daf-16(mu86)</i>                                                                 | <i>ins-1</i> <sup>c</sup>  | <i>ins-1</i>  | 183.2                         | ±5.8             | 14             |
| CF1038                   | <i>daf-16(mu86)</i>                                                                 | <i>ins-3</i> <sup>c</sup>  | <i>ins-3</i>  | 168.7                         | ±3.2             | 20             |
| CF1038                   | <i>daf-16(mu86)</i>                                                                 | <i>ins-33</i> <sup>c</sup> | <i>ins-33</i> | 172.6                         | ±4.6             | 14             |
| CF1038                   | <i>daf-16(mu86)</i>                                                                 | sjj_C46A5.9 <sup>d</sup>   | <i>hcf-1</i>  | 191.9                         | ±6.4             | 16             |
| CF1038                   | <i>daf-16(mu86)</i>                                                                 | pGC488 <sup>e</sup>        | <i>daf-2</i>  | 194.5                         | ±3.3             | 15             |
| RB777                    | <i>hcf-1(ok559)</i>                                                                 |                            |               | 128.4                         | ±9.1             | 14             |
| GC1071                   | <i>ins-3(ok2488)</i>                                                                |                            |               | 162.4                         | ±6.4             | 18             |

|                        |                                                                              |                           |               |       |      |    |
|------------------------|------------------------------------------------------------------------------|---------------------------|---------------|-------|------|----|
| GC1071                 | <i>ins-3(ok2488)</i>                                                         | L4440                     |               | 168.6 | ±6.6 | 15 |
| GC1071                 | <i>ins-3(ok2488)</i>                                                         | <i>ins-3<sup>c</sup></i>  | <i>ins-3</i>  | 186.5 | ±2.8 | 13 |
| GC1071                 | <i>ins-3(ok2488)</i>                                                         | <i>ins-33<sup>c</sup></i> | <i>ins-33</i> | 183.8 | ±5.1 | 13 |
| GC1071                 | <i>ins-3(ok2488)</i>                                                         | mv_CAA10315 <sup>f</sup>  | <i>daf-18</i> | 218.2 | ±4.6 | 11 |
| GC1071                 | <i>ins-3(ok2488)</i>                                                         | sjj_R13H8.1 <sup>d</sup>  | <i>daf-16</i> | 216.3 | ±4.0 | 15 |
| GC1079sib <sup>g</sup> | <i>ins-3(ok2488)</i><br><i>ins-3(ok2488);</i><br><i>naEx187[ins3(+)]</i>     |                           |               | 170.8 | ±6.5 | 6  |
| GC1079 <sup>g</sup>    |                                                                              |                           |               | 198.6 | ±4.3 | 10 |
| GC1088sib <sup>g</sup> |                                                                              |                           |               | 204.3 | ±5.7 | 11 |
| GC1088 <sup>g</sup>    | <i>naEx196[ins-3(++)]</i>                                                    |                           |               | 167.5 | ±5.2 | 13 |
| GC1039                 | <i>ins-33(tm2988)</i>                                                        |                           |               | 170.8 | ±4.9 | 20 |
| GC1039                 | <i>ins-33(tm2988)</i>                                                        | L4440                     |               | 166.4 | ±7.6 | 15 |
| GC1039                 | <i>ins-33(tm2988)</i>                                                        | <i>ins-3<sup>c</sup></i>  | <i>ins-3</i>  | 177.6 | ±4.5 | 11 |
| GC1039                 | <i>ins-33(tm2988)</i>                                                        | <i>ins-33<sup>c</sup></i> | <i>ins-33</i> | 170.2 | ±5.4 | 14 |
| GC1039                 | <i>ins-33(tm2988)</i>                                                        | mv_CAA10315 <sup>f</sup>  | <i>daf-18</i> | 204.7 | ±5.1 | 16 |
| GC1039                 | <i>ins-33(tm2988)</i>                                                        | sjj_R13H8.1 <sup>d</sup>  | <i>daf-16</i> | 214.8 | ±6.5 | 16 |
| GC1078sib <sup>g</sup> | <i>ins-33(tm2988)</i><br><i>ins-33(tm2988);</i><br><i>naEx186[ins-33(+)]</i> |                           |               | 178.6 | ±4.9 | 9  |
| GC1078 <sup>g</sup>    |                                                                              |                           |               | 202.3 | ±8.0 | 8  |
| GC1089sib <sup>g</sup> | <i>ins-33(tm2988)</i><br><i>ins-33(tm2988);</i><br><i>naEx197[ins-33(+)]</i> |                           |               | 168.9 | ±4.5 | 11 |
| GC1089 <sup>g</sup>    |                                                                              |                           |               | 200.6 | ±6.7 | 12 |
| GC1087sib <sup>g</sup> | <i>ins-33(tm2988)</i><br><i>ins-33(tm2988);</i><br><i>naEx195[ins-33(+)]</i> |                           |               | 175.2 | ±4.8 | 14 |
| GC1087 <sup>g</sup>    |                                                                              |                           |               | 198.2 | ±6.2 | 12 |
| GC1076sib <sup>g</sup> |                                                                              |                           |               | 214.1 | ±5.6 | 10 |
| GC1076 <sup>g</sup>    | <i>naEx184[ins-33(++)]</i>                                                   |                           |               | 204.3 | ±6.6 | 12 |
| GC1077sib <sup>g</sup> |                                                                              |                           |               | 219.6 | ±7.4 | 9  |
| GC1077 <sup>g</sup>    | <i>naEx185[ins-33(++)]</i>                                                   |                           |               | 217.3 | ±6.3 | 9  |
| GC1142                 | <i>ins-33(tm2988);ins-3(ok2488)</i>                                          |                           |               | 183.8 | ±7.1 | 16 |

<sup>a</sup> Worms were grown on OP50 or the indicated RNAi reagent at 20°C from L1 (immediately after hatch-off) until early adulthood, when they were ethanol fixed and DAPI stained. The number of nuclei in the proliferative zone was determined. See Materials and methods (main text) for details.

<sup>b</sup> SEM, standard error of the mean; n, number of gonad arms examined.

<sup>c</sup> RNAi reagent courtesy of Monica Driscoll; see Table S2.

<sup>d</sup> Ahringer library (Kamath et al., 2003).

<sup>e</sup> Vidal library (Rual et al., 2004).

<sup>f</sup> RNAi reagent made for this study; see Table S2.

<sup>g</sup> Sibling progeny from strains bearing transgenes were separated prior to scoring. As indicated under 'Genotype', top line of each pair is data from progeny without the transgene (sibling controls, 'sib') and bottom line of each pair is data from progeny that retained the transgene.

<sup>h</sup> DAF-16::GFP expression in muscle (but not the other tissues) uncovers the 24-hour delay in larval development characteristic of *daf-2(e1370)*, suggesting that *daf-16* activity in the muscle or proximal sheath is important for overall developmental timing.
