# Supplementary material for: Insulin signaling promotes germline proliferation inC. elegans
Source: Oxford University Press journal article supplement (doi:10.1242/dev.042523), 2010-01-28
Supplement: dev042523tables4.pdf [file dev042523tables4.pdf]

**Table S4. Dauer tests****A**

| Strain | Genotype                         | Dauer (%) <sup>a</sup> | <i>n</i> <sup>b</sup> |
|--------|----------------------------------|------------------------|-----------------------|
| CB1370 | <i>daf-2(e1370)</i>              | 0.9                    | 114                   |
| DR1309 | <i>daf-16(m26); daf-2(e1370)</i> | 0.0                    | 100                   |

<sup>a</sup> Worms were grown on OP50 at 20°C for 72 hours and scored for the number of dauer worms divided by the total worms on the plate. [Similar results seen for CB1370 in Larsen et al. (Larsen et al., 1995)].

<sup>b</sup> *n*, number of worms examined.

Statistics:  $P >> 0.05$ , one-sided Fisher exact test.

**B**

| Strain              | Genotype                                                             | Dauer (%) <sup>a</sup> | <i>n</i> <sup>b</sup> |
|---------------------|----------------------------------------------------------------------|------------------------|-----------------------|
| CB1370              | <i>daf-2(e1370)</i>                                                  | 100.0                  | 100                   |
| DR1309              | <i>daf-16(m26); daf-2(e1370)</i>                                     | 0.0                    | 100                   |
| CF1442 <sup>c</sup> | <i>daf-16(mu86); daf-2(e1370)</i>                                    | 0.0                    | 100                   |
| CF1442 <sup>c</sup> | <i>daf-16(mu86); daf-2(e1370); muEx169[Punc119-<br/>daf-16::GFP]</i> | 29.7                   | * 64                  |

<sup>a</sup> Worms were grown on OP50 at 25°C for 60 hours and scored for the number of dauer worms divided by the total worms on the plate.

<sup>b</sup> *n*, number of worms examined.

<sup>c</sup> Sibling progeny from strains bearing transgenes were separated prior to scoring. As indicated under 'Genotype', top line is data from progeny without the transgene (sibling controls) and bottom line is data from progeny that retained the transgene.

Statistics: \* $P < 0.05$ , one-sided Fisher exact test versus *daf-2(e1370)* alone or *daf-16(mu86); daf-2(e1370)*; restoration to ~30% dauer is considered rescue (anti-suppression) of *daf-16* (Libina et al., 2003).

**C**

| Strain | Genotype              | RNAi          | Dauer (%) <sup>a</sup> | <i>n</i> <sup>b</sup> |
|--------|-----------------------|---------------|------------------------|-----------------------|
| N2     |                       | (none)        | 6.1                    | 49                    |
| GC1039 | <i>ins-33(tm2988)</i> | (none)        | 1.2                    | 81                    |
| GC1071 | <i>ins-3(ok2488)</i>  | (none)        | 0.0                    | 65                    |
| N2     |                       | L4440         | 12.9                   | 62                    |
| N2     |                       | <i>daf-2</i>  | 100.0                  | * 53                  |
| N2     |                       | <i>ins-3</i>  | 7.2                    | 97                    |
| N2     |                       | <i>ins-33</i> | 11.4                   | 79                    |

<sup>a</sup> Worms were grown either on OP50 or on the indicated RNAi (fed on RNAi from parental L4 stage) at 27°C for 60 hours and scored for the number of dauer worms divided by the total worms on the plate. See Table S3 for RNAi reagents.

<sup>b</sup> *n*, number of worms examined.

Statistics: \* $P < 0.05$ , one-sided Fisher exact test versus L4440 control; for all others,  $P >> 0.05$  (line 2 and 3 versus line 1, and lines 6 and 7 versus line 4).
