# Supplementary material for: Insulin signaling promotes germline proliferation inC. elegans
Source: Oxford University Press journal article supplement (doi:10.1242/dev.042523), 2010-01-28
Supplement: dev042523tables5.pdf [file dev042523tables5.pdf]

**Table S5. Insulin signaling is not required for normal germ cell size**

| Strain | Genotype            | RNAi reagent               | RNAi target   | Average volume ( $\mu\text{m}^3$ ) <sup>a</sup> | SEM <sup>b</sup> | <i>P</i> | <i>n</i> <sup>b</sup> |
|--------|---------------------|----------------------------|---------------|-------------------------------------------------|------------------|----------|-----------------------|
| FT224  |                     | L4440                      |               | 167.1                                           | ±5.1             |          | 40                    |
| FT224  |                     | mv_Y47D3A.16 <sup>c</sup>  | <i>rsk-1</i>  | 147.4                                           | ±4.2             | **       | 50                    |
| FT224  |                     | pGC488 <sup>d</sup>        | <i>daf-2</i>  | 167.2                                           | ±4.9             |          | 50                    |
| FT224  |                     | <i>ins-3</i> <sup>e</sup>  | <i>ins-3</i>  | 173.8                                           | ±5.7             |          | 40                    |
| FT224  |                     | <i>ins-33</i> <sup>e</sup> | <i>ins-33</i> | 175.6                                           | ±5.8             |          | 40                    |
| GC1145 | <i>daf-2(e1370)</i> | none                       | none          | 163.9                                           | ±4.7             |          | 29                    |

<sup>a</sup> SYN-4::GFP-expressing worms were grown on the indicated RNAi reagent from L1 (immediately after hatch-off) until the L4 larval stage, then observed live for GFP fluorescence marking the membranes.

Images were captured in the z-plane at 1  $\mu\text{m}$  intervals, and x-y measurements were taken across two different main axes of the cell (in the z plane with the largest cell diameter) using the line measurement tool in Axiovision software (Carl Zeiss). The number of z layers was multiplied by the x and y line measurements to obtain cell volume. For each gonad, five 'cells' were sampled. Note that although germ cells in the proliferative zone are technically syncytial, as they open into a core of shared cytoplasm referred to as the rachis, each nucleus is surrounded by an almost-complete plasma membrane. Therefore it is possible to measure a 'cell' volume despite an opening into the rachis. A total of 8-10 worms were tested for a total of 40-50 individual 'cells' measured.

<sup>b</sup> SEM, standard error of the mean; n, number of cells measured.

<sup>c</sup> Vidal RNAi library (Rual et al., 2004).

<sup>d</sup> RNAi reagent made for this study.

<sup>e</sup> RNAi reagent courtesy of Monica Driscoll.

Statistics: \*\* $P < 0.01$ , two-tailed Student's *t*-test versus L4440; for others,  $P > 0.1$ .
