# Supplementary material for: Insulin signaling promotes germline proliferation inC. elegans
Source: Oxford University Press journal article supplement (doi:10.1242/dev.042523), 2010-01-28
Supplement: dev042523tables6.pdf [file dev042523tables6.pdf]

**Table S6. *ins-33* enhances the Pro phenotype of *glp-1(ar202)***

| Strain | Genotype                           | Pro (%) <sup>a</sup> | <i>n</i> <sup>b</sup> |
|--------|------------------------------------|----------------------|-----------------------|
| GC833  | <i>glp-1(ar202)</i>                | 6.5%                 | 214                   |
| GC1106 | <i>ins-3(ok2488);glp-1(ar202)</i>  | 19.7%                | 228                   |
| GC1009 | <i>ins-33(tm2988);glp-1(ar202)</i> | 29.5%                | 322                   |

<sup>a</sup> Worms were synchronized by hatch off onto OP50 bacteria and grown to young adulthood at 20°C, then fixed in ethanol, DAPI stained and scored for the Pro phenotype as described (Pepper et al., 2003a; Pepper et al., 2003b).

<sup>b</sup> *n*, number of worms examined.

Statistics:  $P < 0.0001$ , one-sided Fisher exact test for each double mutant versus the *glp-1(ar202)* single mutant.
